# Supplementary material
Source: HighWire-hosted journal article supplement (http://rc.rcjournal.com/highwire/filestream/20612/field_highwire_adjunct_files/0/8749suppl.docx)

# Supplemental Material

## Ventilator settings


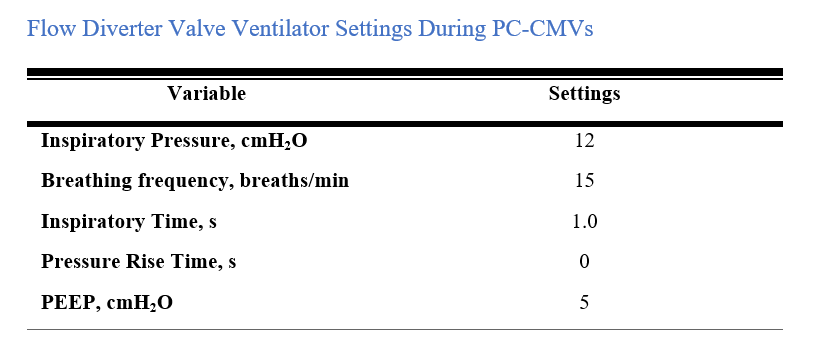


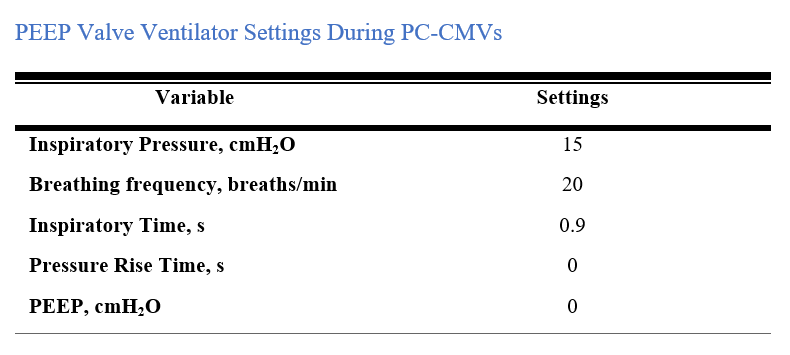


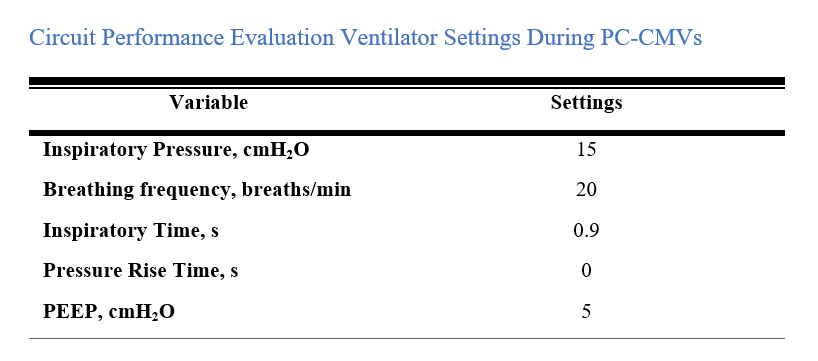


## Performance Tables


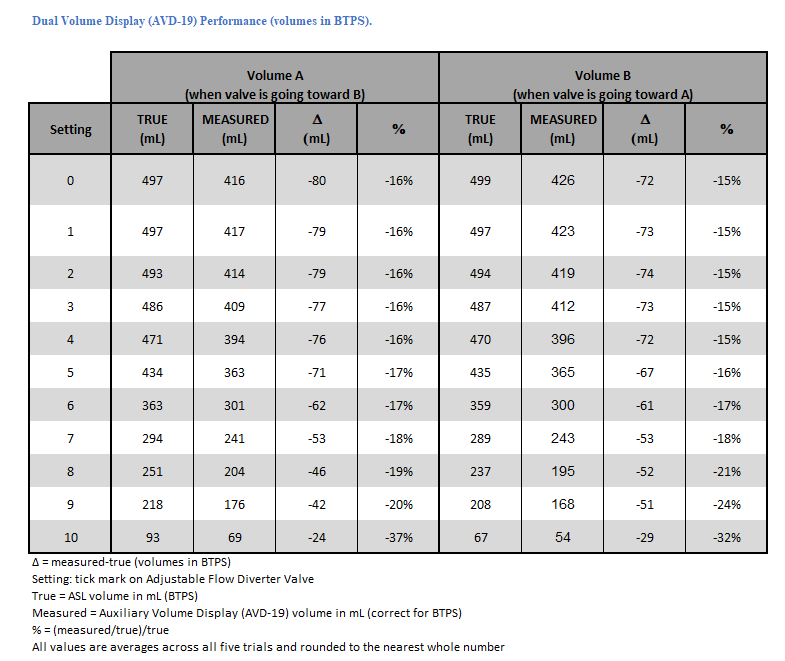


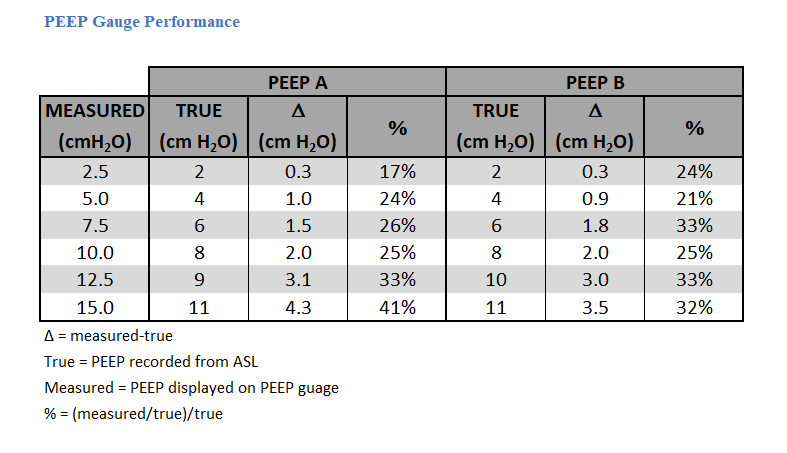


## Figures


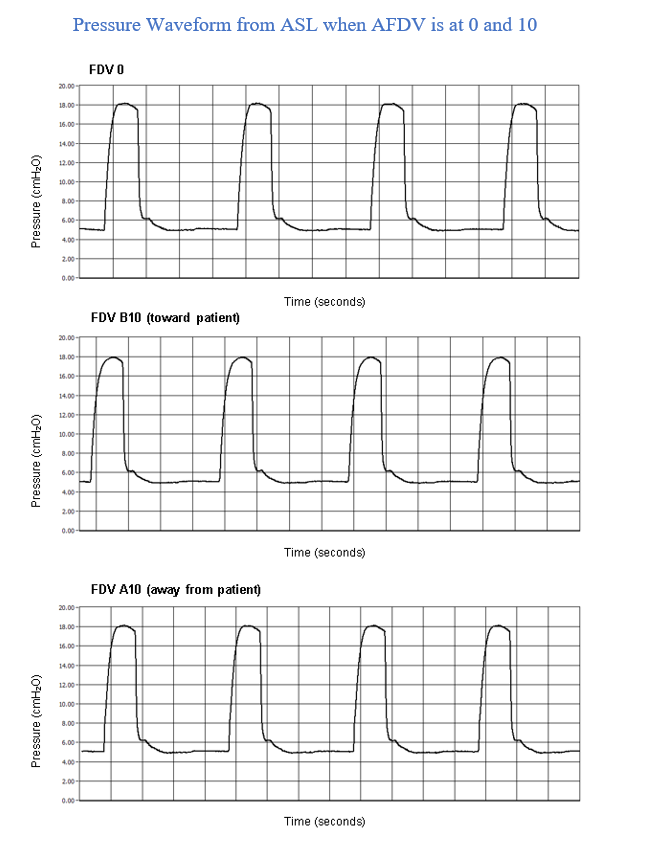


## PEEP Valve


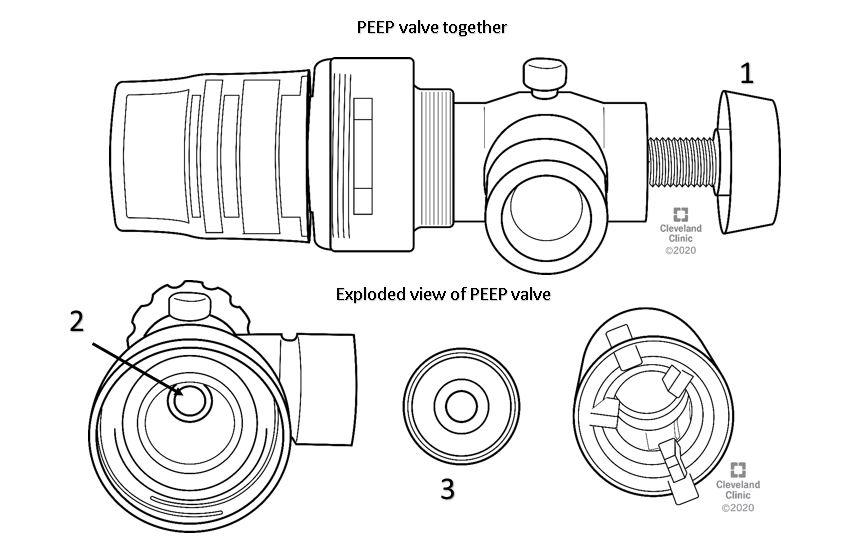


## PEEP Gauge


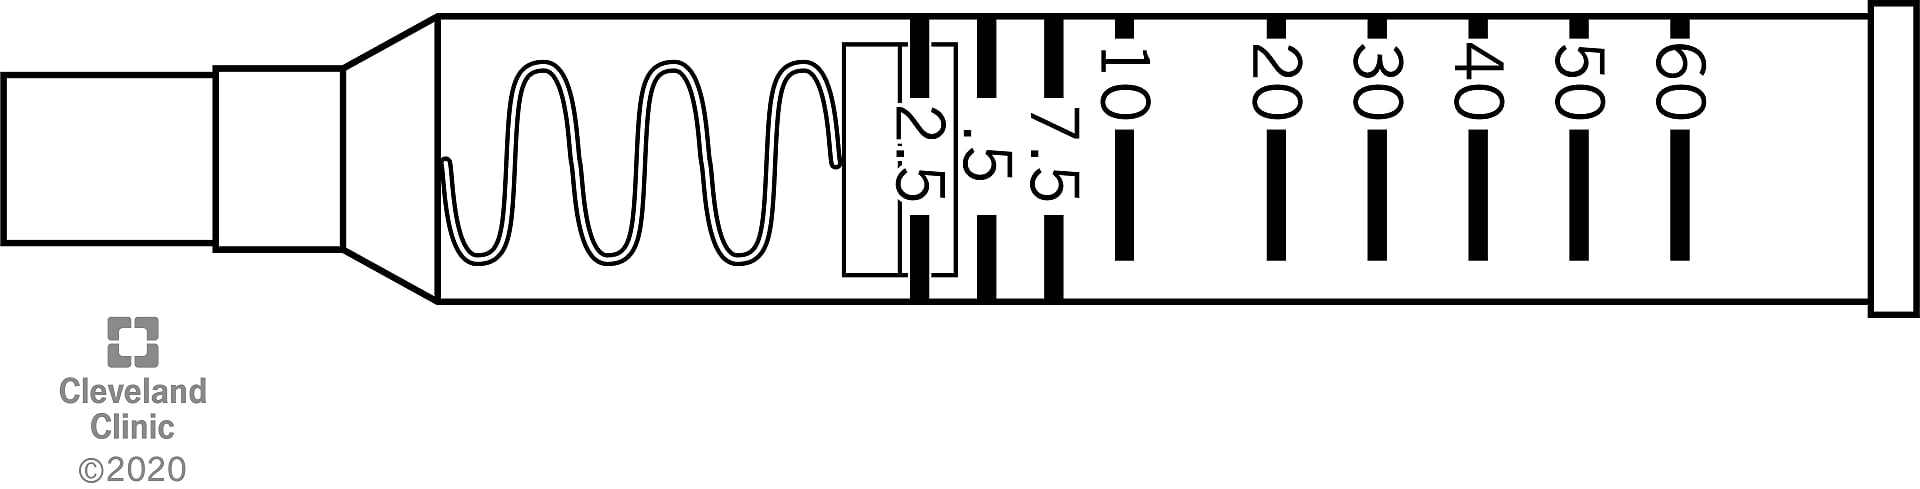

Supplement: 8749suppl.docx [file 8749suppl.docx]
